# Supplementary material for: Effects of Heating on the Binding of Rare Earth Elements to Humic Acids
Source: MDPI journal article supplement (doi:10.3390/en15197362), 2022-10-07
Supplement: s1 [file s1]

## Supplementary Electronic File S1.

**Table S1.** REE concentration (µg/L) in the filtrate for experiment 1.

|          | La   | Ce   | Pr   | Nd   | Sm   | Eu   | Gd   | Tb   | Dy   | Ho   | Er   | Tm   | Yb   | Lu   |
|----------|------|------|------|------|------|------|------|------|------|------|------|------|------|------|
| 3-2-1-0  | /    | /    | 145  | 141  | /    | 110  | 115  | 135  | 129  | /    | 142  | /    | /    | /    |
| 3-2-1-1  | /    | /    | 146  | 148  | /    | 115  | 120  | 141  | 128  | /    | 144  | /    | 149  | /    |
| 3-2-1-2  | 134  | 128  | 123  | 124  | 134  | 99.2 | 108  | 125  | 122  | 135  | 129  | 141  | 133  | 145  |
| 3-2-1-3  | 143  | 141  | 135  | 139  | /    | 110  | 114  | 133  | 128  | 142  | 132  | 147  | 134  | /    |
| 3-2-1-4  | 0.62 | 0.94 | 1.56 | 2.17 | 5.84 | 5.77 | 7.25 | 12   | 13.7 | 15.7 | 16.8 | 18.5 | 20.7 | 20.4 |
| 3-4-1-0  | /    | /    | /    | /    | /    | 120  | 126  | 147  | 137  | /    | 146  | /    | /    | /    |
| 3-4-1-1  | /    | /    | /    | /    | /    | 134  | 139  | /    | /    | /    | /    | /    | /    | /    |
| 3-4-1-2  | /    | /    | /    | 144  | /    | 118  | 124  | 146  | 136  | /    | 149  | /    | /    | /    |
| 3-4-1-3  | 23.7 | 26.6 | 32.7 | 38.4 | 63.2 | 55.6 | 70.9 | 92.7 | 96.8 | 114  | 103  | 114  | 105  | 109  |
| 3-4-1-4  | 1.55 | 2.1  | 3.16 | 3.55 | 7.86 | 8.35 | 12.8 | 15.5 | 18.4 | 20.1 | 20.9 | 25.5 | 27.8 | 29.8 |
| 3-6-1-0  | /    | /    | /    | /    | /    | 122  | 130  | /    | 142  | /    | /    | /    | /    | /    |
| 3-6-1-1  | /    | /    | /    | /    | /    | 129  | 136  | /    | 145  | /    | /    | /    | /    | /    |
| 3-6-1-2  | /    | /    | /    | /    | /    | 128  | 134  | /    | /    | /    | /    | /    | /    | /    |
| 3-6-1-3  | 17.4 | 19.8 | 28.8 | 37.3 | 64.9 | 58   | 72.8 | 98.9 | 102  | 119  | 113  | 120  | 110  | 116  |
| 3-6-1-4  | ND   | 0.16 | 0.33 | 0.42 | 1.6  | 0.93 | 1.46 | 2.59 | 3.52 | 4.15 | 5.09 | 7.1  | 10.4 | 9.54 |
| 3-7-1-0  | /    | /    | /    | /    | /    | 120  | 124  | 146  | 139  | /    | /    | /    | /    | /    |
| 3-7-1-1  | /    | /    | /    | /    | /    | 120  | 129  | 147  | 137  | /    | 149  | /    | /    | /    |
| 3-7-1-2  | 148  | 141  | 138  | 141  | 146  | 110  | 120  | 137  | 132  | 147  | 140  | /    | 148  | /    |
| 3-7-1-3  | 7.36 | 8.79 | 12.2 | 15.6 | 34.8 | 35.2 | 47.1 | 70.3 | 77.2 | 89.2 | 83.1 | 89.9 | 85.3 | 85.5 |
| 3-7-1-4  | -    | -    | 0.09 | 0.28 | 0.48 | 1.17 | 1.64 | 2.86 | 3.6  | 4.55 | 5.05 | 7.51 | 9.9  | 10.5 |
| 3-8-1-0  | /    | 148  | 148  | 146  | /    | 113  | 118  | 137  | 126  | 147  | 134  | /    | 148  | /    |
| 3-8-1-1  | /    | /    | /    | /    | /    | 121  | 129  | 147  | 139  | /    | 146  | /    | /    | /    |
| 3-8-1-2  | /    | 147  | 142  | 145  | /    | 115  | 125  | 146  | 138  | /    | 143  | /    | /    | /    |
| 3-8-1-3  | /    | /    | /    | /    | /    | 123  | 128  | /    | 139  | /    | 148  | /    | /    | /    |
| 3-8-1-4  | -    | 0.08 | 0.16 | 0.52 | 1.27 | 1.64 | 2.1  | 3.49 | 4.48 | 5.51 | 6.23 | 8.62 | 11   | 11.6 |
| 3-10-1-0 | /    | /    | /    | /    | /    | 125  | 133  | /    | 138  | /    | /    | /    | /    | /    |
| 3-10-1-1 | /    | /    | /    | /    | /    | 125  | 137  | /    | 144  | /    | /    | /    | /    | /    |
| 3-10-1-2 | /    | /    | /    | 146  | /    | 121  | 129  | /    | 144  | /    | /    | /    | /    | /    |
| 3-10-1-3 | 43.2 | 45.2 | 53.9 | 60.5 | 88.6 | 74.5 | 88.6 | 112  | 113  | 128  | 118  | 133  | 122  | 126  |
| 3-10-1-4 | -    | -    | 0.34 | 0.19 | 1.11 | 1.25 | 2.07 | 3.87 | 4.67 | 5.7  | 6.44 | 8.6  | 12.7 | 12   |
| 3-12-1-0 | /    | /    | /    | /    | /    | 125  | 130  | /    | 140  | /    | /    | /    | /    | /    |
| 3-12-1-1 | /    | /    | /    | /    | /    | 128  | 139  | /    | 146  | /    | /    | /    | /    | /    |
| 3-12-1-2 | /    | /    | 147  | 147  | /    | 115  | 124  | 146  | 137  | /    | 146  | /    | /    | /    |
| 3-12-1-3 | 8.27 | 9.72 | 13.6 | 16.1 | 36.7 | 38.1 | 49.1 | 71.7 | 81.8 | 90.7 | 82.4 | 90   | 84.4 | 84.5 |
| 3-12-1-4 | 0.07 | -    | 0.13 | 0.22 | 0.92 | 0.96 | 1.32 | 2.69 | 3.58 | 5.06 | 5.46 | 7.73 | 11.9 | 11.7 |

|          |      |      |      |      |      |      |      |      |      |      |      |      |      |      |
|----------|------|------|------|------|------|------|------|------|------|------|------|------|------|------|
| 3-14-1-0 | /    | /    | /    | /    | /    | 123  | 131  | /    | 140  | /    | /    | /    | /    | /    |
| 3-14-1-1 | /    | /    | /    | /    | /    | 124  | 129  | /    | 140  | /    | 146  | /    | /    | /    |
| 3-14-1-2 | /    | 148  | 143  | 145  | /    | 114  | 122  | 145  | 140  | /    | 141  | /    | /    | /    |
| 3-14-1-3 | 144  | 140  | 140  | 141  | /    | 121  | 130  | /    | 145  | /    | 154  | /    | /    | /    |
| 3-14-1-4 | 0.48 | 0.91 | 1.24 | 1.57 | 3.52 | 3.46 | 3.89 | 6.07 | 7.37 | 8.16 | 8.59 | 11.2 | 12.8 | 13   |
| 2-2-1-0  | /    | /    | /    | 149  | /    | 120  | 126  | 144  | 135  | /    | 145  | /    | /    | /    |
| 2-2-1-1  | /    | /    | /    | /    | /    | 127  | 135  | /    | 147  | /    | /    | /    | /    | /    |
| 2-2-1-2  | /    | 147  | 138  | 135  | /    | 113  | 120  | 141  | 132  | /    | 146  | /    | /    | /    |
| 2-2-1-3  | /    | /    | /    | /    | /    | 128  | 133  | /    | 147  | /    | /    | /    | /    | /    |
| 2-2-1-4  | 2.16 | 3.43 | 5.05 | 5.93 | 12.7 | 11.3 | 12.7 | 19.4 | 22.2 | 26.7 | 24.4 | 31.6 | 34.7 | 36.1 |
| 2-4-1-0  | /    | 148  | 144  | 141  | /    | 111  | 120  | 134  | 130  | 146  | 136  | /    | 146  | /    |
| 2-4-1-1  | /    | /    | /    | /    | /    | 126  | 133  | /    | 139  | /    | /    | /    | /    | /    |
| 2-4-1-2  | /    | /    | 146  | 145  | /    | 116  | 119  | 145  | 138  | /    | 145  | /    | /    | /    |
| 2-4-1-3  | 15.5 | 16.8 | 21   | 25.6 | 46.6 | 44.5 | 54.6 | 77.1 | 81.2 | 95   | 87   | 97.7 | 87.8 | 91.4 |
| 2-4-1-4  | 1.08 | 1.62 | 2.3  | 3.58 | 7.33 | 6.34 | 6.87 | 11.8 | 13.2 | 16.2 | 16.3 | 21.2 | 26.4 | 26.3 |

/, not performed; -, below detection limit; the suffix 0, 1, 2, 3, 4 refers to the REE concentration obtained at temperatures of 20, 50, 100, 150, and 200 °C, respectively. For instance, 3-2-1-0, 3-2-1-1, 3-2-1-2, 3-2-1-3, and 3-2-1-4 are the REE concentration in the filtrate for sample 3-2 obtained at temperatures of 20, 50, 100, 150, and 200 °C. The same for the below tables.

**Table S2.** REE concentration (µg/L) in the filtrate for experiment 2.

|          | La   | Ce   | Pr   | Nd   | Sm   | Eu   | Gd   | Tb   | Dy   | Ho   | Er   | Tm   | Yb   | Lu   |
|----------|------|------|------|------|------|------|------|------|------|------|------|------|------|------|
| 3-2-2-0  | /    | 47.6 | 46.1 | 45.1 | 44.4 | 33.6 | 37.8 | 42.8 | 40.5 | 48.8 | 43.8 | 49.9 | 45.8 | 49.6 |
| 3-2-2-1  | 44   | 41.4 | 35.3 | 34.3 | 34.1 | 26.1 | 30   | 34.9 | 32.4 | 38.5 | 36   | 40.2 | 39.7 | 41   |
| 3-2-2-2  | 34.7 | 31.8 | 30.6 | 29.9 | 33.9 | 26.1 | 29.3 | 35.1 | 35.4 | 39.1 | 35.5 | 41.2 | 39.4 | 40.9 |
| 3-2-2-3  | 6.97 | 8.32 | 9.11 | 12.5 | 20.9 | 17.7 | 21.4 | 30.5 | 30.5 | 35.2 | 34.6 | 36   | 42.4 | 34.9 |
| 3-2-2-4  | 0.25 | 0.32 | 0.93 | 0.78 | 2.24 | 2.54 | 3.69 | 4.86 | 6.11 | 6.87 | 8.06 | 10.3 | 13.7 | 13.5 |
| 3-4-2-0  | /    | 49.6 | 46.3 | 45   | /    | 35.1 | 38.1 | 43.6 | 42.5 | 48.5 | 44.3 | /    | 48.9 | /    |
| 3-4-2-1  | 47.6 | 46.2 | 42.9 | 42   | 45.3 | 32.7 | 35.1 | 41.7 | 40.5 | 45.9 | 44.1 | 46.9 | 45.6 | 49.3 |
| 3-4-2-2  | 42.7 | 39.7 | 38.5 | 36.8 | 42.5 | 32   | 35.5 | 42   | 38.6 | 45.6 | 43.3 | 48.6 | 44.3 | 48.5 |
| 3-4-2-3  | /    | /    | /    | /    | /    | 43.3 | 46.1 | /    | /    | /    | /    | /    | /    | /    |
| 3-4-2-4  | 0.16 | 0.36 | 0.63 | 0.97 | 2.19 | 2.24 | 2.32 | 4.12 | 5.35 | 5.77 | 6.08 | 9.07 | 11.9 | 12.1 |
| 3-6-2-0  | 43.7 | 42.6 | 40.9 | 37.7 | 41.2 | 29.4 | 33.1 | 38.1 | 37.8 | 41.8 | 39.5 | 44.1 | 42.5 | 45.5 |
| 3-6-2-1  | 45   | 42.1 | 40.1 | 40.1 | 38.8 | 30.2 | 35.2 | 38.8 | 39.1 | 43.9 | 39.5 | 44.8 | 43   | 46.2 |
| 3-6-2-2  | 41.9 | 39.8 | 37.4 | 37.1 | 43.7 | 31.5 | 34.8 | 40.2 | 39.2 | 44.6 | 42.2 | 45.7 | 44.7 | 47.3 |
| 3-6-2-3  | /    | /    | 48.8 | /    | /    | 40.6 | 40.4 | 48.7 | 45.4 | /    | 49.5 | /    | 49.7 | /    |
| 3-6-2-4  | 0.8  | 1.39 | 1.89 | 2.63 | 5.06 | 4.89 | 5.7  | 9.24 | 10.2 | 12.3 | 13.1 | 16.8 | 18.6 | 20.6 |
| 3-7-2-0  | 49.9 | 47.4 | 45.7 | 45.2 | 45.1 | 33.8 | 33.9 | 42.4 | 40.6 | 47.6 | 43.1 | 48.9 | 45   | /    |
| 3-7-2-1  | 45.6 | 43.8 | 39.6 | 40   | 43.3 | 30.1 | 32   | 38.1 | 37.5 | 43.9 | 41.2 | 43.7 | 41.5 | 45.5 |
| 3-7-2-2  | 45.2 | 41.1 | 41   | 41.3 | 43.9 | 33.7 | 37.6 | 46.5 | 46.7 | /    | 45.7 | /    | 47.7 | /    |
| 3-7-2-3  | 38.3 | 37.3 | 37.7 | 38.3 | 47.2 | 35.4 | 38.4 | 44.8 | 43.2 | 48.3 | 45.2 | 49.7 | 45.1 | /    |
| 3-7-2-4  | 1.01 | 1.43 | 2.26 | 2.27 | 5.26 | 5.45 | 5.44 | 9.07 | 11.2 | 12.9 | 12.5 | 17.1 | 19.8 | 21.2 |
| 3-8-2-0  | 46.4 | 42.7 | 39.6 | 39   | 37.8 | 29.9 | 32.9 | 38.2 | 37.9 | 43.2 | 40   | 45.5 | 42.9 | 46.6 |
| 3-8-2-1  | 44.4 | 41.4 | 37.9 | 39.5 | 37.1 | 29   | 32.3 | 37   | 36   | 41.7 | 41.2 | 43.1 | 38.5 | 44.2 |
| 3-8-2-2  | 38   | 34.8 | 33.1 | 32.8 | 38.9 | 28.3 | 32.1 | 39   | 38.9 | 42.3 | 39.7 | 44.2 | 45.6 | 44.8 |
| 3-8-2-3  | 8.56 | 10.8 | 13.2 | 15.2 | 25.2 | 22.9 | 24.8 | 33.9 | 34.8 | 37.6 | 35.8 | 38   | 37.7 | 37.8 |
| 3-8-2-4  | 0.21 | 0.52 | 0.71 | 0.72 | 2.22 | 2.33 | 2.35 | 5.31 | 6.52 | 7.3  | 8    | 11.4 | 14.8 | 15.2 |
| 3-10-2-0 | 47.9 | 45.5 | 42.8 | 40.7 | 42.4 | 31.6 | 34.3 | 40.1 | 37.9 | 44.7 | 43   | 47.5 | 44.7 | 47.3 |
| 3-10-2-1 | 43.8 | 40.9 | 37.6 | 37   | 38.6 | 27.9 | 31   | 37   | 35.6 | 40.7 | 39   | 43.2 | 39.8 | 43.7 |
| 3-10-2-2 | 40.7 | 38.1 | 38.1 | 37.5 | 45.4 | 34.2 | 37.8 | 44.8 | 45.1 | 48.2 | 44.4 | 49.3 | 48.4 | /    |
| 3-10-2-3 | 4    | 5.66 | 9.52 | 11.3 | 22.7 | 20.3 | 24.9 | 34.1 | 35.1 | 39.1 | 35.7 | 39.3 | 37.7 | 37.7 |
| 3-10-2-4 | 0.26 | 0.49 | 0.79 | 1.3  | 3.29 | 2.78 | 3.44 | 6.14 | 6.83 | 7.93 | 8.28 | 11.3 | 13.6 | 13.9 |
| 3-12-2-0 | /    | 47.7 | 46.8 | 45.3 | 47.7 | 34.1 | 36.3 | 44   | 40.7 | 48.1 | 44.3 | /    | 46.9 | /    |
| 3-12-2-1 | /    | 47   | 45.9 | 46.2 | 46.9 | 35.3 | 39.3 | 44.4 | 40.4 | 49.6 | 45.1 | /    | 47.9 | /    |
| 3-12-2-2 | 39.5 | 37   | 36.2 | 35   | 39.3 | 31.1 | 33.9 | 41.5 | 39   | 44.2 | 42.3 | 44.2 | 43   | 45.8 |
| 3-12-2-3 | 3.05 | 5.28 | 8.27 | 9.97 | 21.6 | 19.2 | 22.9 | 31   | 34.3 | 38.6 | 32.5 | 38   | 36.6 | 37.3 |
| 3-12-2-4 | 0.39 | 0.8  | 1.28 | 1.92 | 5.71 | 6.15 | 7.63 | 11.7 | 14   | 15.6 | 15.6 | 20.2 | 22.2 | 22.7 |

|          |      |      |      |      |      |      |      |      |      |      |      |      |      |      |
|----------|------|------|------|------|------|------|------|------|------|------|------|------|------|------|
| 3-14-2-0 | 47.3 | 44.3 | 42.5 | 42.2 | 42.7 | 31.5 | 34.5 | 40.1 | 39.8 | 45.4 | 43.4 | 47.1 | 47.6 | 48.6 |
| 3-14-2-1 | 45.7 | 43.1 | 41.6 | 40.2 | 43.5 | 31.5 | 33.8 | 39.5 | 39.3 | 44.3 | 40   | 45   | 43.2 | 47.3 |
| 3-14-2-2 | 43.8 | 43.5 | 40.9 | 41.3 | 46.3 | 36.4 | 37.1 | 45.4 | 44.5 | 49.6 | 45.6 | /    | 49.2 | /    |
| 3-14-2-3 | 49.7 | 48.1 | 46.9 | 46.1 | /    | 37.5 | 40.6 | 48.6 | 44.8 | /    | 48.1 | /    | /    | /    |
| 3-14-2-4 | 0.33 | 0.62 | 0.98 | 1.24 | 2.6  | 3.51 | 4.05 | 6.71 | 8.7  | 9.59 | 10.6 | 14.3 | 17.1 | 17.4 |
|          |      |      |      |      |      |      |      |      |      |      |      |      |      |      |
| 2-2-2-0  | /    | 46.9 | 45.7 | 44.3 | 46.9 | 35.4 | 38.8 | 42.9 | 39.2 | 47   | 42.9 | 49.8 | 47.1 | /    |
| 2-2-2-1  | 47.9 | 45.7 | 44.1 | 43.3 | 44.4 | 32.5 | 36.3 | 41.6 | 38.5 | 46.1 | 41.3 | 47.5 | 44.9 | 49   |
| 2-2-2-2  | 48   | 45   | 44.5 | 43.8 | /    | 37.3 | 39.6 | 48.4 | 44.9 | /    | 47.4 | /    | /    | /    |
| 2-2-2-3  | 10.7 | 12.6 | 16.2 | 18.5 | 29.1 | 24.6 | 30   | 36.7 | 36.8 | 41   | 38.2 | 41.7 | 38.2 | 39.2 |
| 2-2-2-4  | 0.19 | 0.51 | 0.72 | 1.01 | 1.98 | 2.96 | 3.6  | 5.78 | 7.34 | 8    | 7.66 | 11.2 | 14.9 | 15   |
|          |      |      |      |      |      |      |      |      |      |      |      |      |      |      |
| 2-4-2-0  | /    | 49.5 | 47.4 | 45.7 | 47.3 | 35.5 | 38.1 | 44.1 | 41   | 49.3 | 45.8 | /    | /    | /    |
| 2-4-2-1  | 47.2 | 45.5 | 42.2 | 42.9 | 41.6 | 31.7 | 35   | 40.3 | 39.7 | 45.4 | 41.9 | 47.2 | 44.4 | 47.5 |
| 2-4-2-2  | 46.6 | 45.4 | 43.8 | 44.5 | 48.7 | 39   | 40.9 | 48.3 | 47.7 | /    | 48.3 | /    | /    | /    |
| 2-4-2-3  | 2.91 | 3.9  | 7.65 | 9.76 | 18.6 | 19.5 | 23.7 | 33   | 35.6 | 39.4 | 37.2 | 39.9 | 36.1 | 37.3 |
| 2-4-2-4  | 0.14 | 0.24 | 0.45 | 0.4  | 1.62 | 1.53 | 1.62 | 3.29 | 4.06 | 5.29 | 5.66 | 7.57 | 10.4 | 9.94 |

**Table S3.** REE concentration (µg/L) in the filtrate for experiment 3.

|          | La   | Ce   | Pr   | Nd   | Sm   | Eu   | Gd   | Tb   | Dy   | Ho   | Er   | Tm   | Yb   | Lu   |
|----------|------|------|------|------|------|------|------|------|------|------|------|------|------|------|
| 3-2-3-0  | 217  | 191  | 176  | 168  | 171  | 125  | 148  | 173  | 170  | 204  | 188  | 210  | 199  | 219  |
| 3-2-3-1  | 206  | 183  | 165  | 161  | 166  | 119  | 145  | 166  | 157  | 191  | 178  | 196  | 182  | 199  |
| 3-2-3-2  | 130  | 117  | 111  | 111  | 128  | 100  | 114  | 148  | 145  | 173  | 164  | 186  | 177  | 192  |
| 3-2-3-3  | 15.8 | 18.9 | 25.4 | 27.8 | 48.2 | 48.5 | 59.7 | 86.5 | 93.7 | 107  | 100  | 113  | 108  | 112  |
| 3-2-3-4  | 1.03 | 1.38 | 1.74 | 2.51 | 5.28 | 5    | 6.56 | 11   | 12.9 | 16.7 | 16   | 21.1 | 25   | 24.5 |
| 3-4-3-0  | 194  | 176  | 158  | 157  | 150  | 134  | 142  | 154  | 162  | 173  | 179  | 180  | 174  | 171  |
| 3-4-3-1  | 243  | 224  | 212  | 203  | 217  | 161  | 178  | 210  | 193  | 231  | 206  | 231  | 218  | 240  |
| 3-4-3-2  | 184  | 167  | 160  | 160  | 184  | 145  | 160  | 197  | 188  | 217  | 201  | 230  | 219  | 235  |
| 3-4-3-3  | 46.3 | 53.3 | 68.8 | 79.9 | 114  | 103  | 124  | 164  | 165  | 188  | 177  | 190  | 183  | 190  |
| 3-4-3-4  | 0.63 | 1.07 | 1.76 | 2.05 | 5.06 | 5.94 | 6.7  | 14.3 | 20.6 | 24   | 25.7 | 31.9 | 40.2 | 40.1 |
| 3-6-3-0  | 237  | 218  | 206  | 200  | 208  | 150  | 170  | 200  | 189  | 226  | 207  | 239  | 223  | 241  |
| 3-6-3-1  | 241  | 226  | 210  | 205  | 217  | 157  | 182  | 211  | 193  | 234  | 213  | 238  | 228  | 243  |
| 3-6-3-2  | 166  | 152  | 145  | 145  | 173  | 130  | 144  | 178  | 178  | 203  | 184  | 211  | 203  | 218  |
| 3-6-3-3  | 8.53 | 11.5 | 17.2 | 21.6 | 39.2 | 38.5 | 48.6 | 75.1 | 83.6 | 95.9 | 89.6 | 98.9 | 96.4 | 95.1 |
| 3-6-3-4  | 1.38 | 2.1  | 2.76 | 3.22 | 5.42 | 5.6  | 7.08 | 11.5 | 13   | 16.1 | 17.4 | 21.5 | 26.1 | 25.8 |
| 3-7-3-0  | 238  | 219  | 206  | 195  | 203  | 149  | 170  | 197  | 191  | 221  | 205  | 235  | 216  | 237  |
| 3-7-3-1  | 249  | 232  | 218  | 216  | 222  | 164  | 182  | 219  | 204  | 239  | 218  | 246  | 231  | /    |
| 3-7-3-2  | 149  | 132  | 128  | 125  | 146  | 117  | 136  | 165  | 161  | 186  | 175  | 200  | 192  | 205  |
| 3-7-3-3  | 2.01 | 3.1  | 4.46 | 6.19 | 15.7 | 16.2 | 21.9 | 36.6 | 43.5 | 52.8 | 52.5 | 60.5 | 57.3 | 58.4 |
| 3-7-3-4  | 0.81 | 1.24 | 1.65 | 1.8  | 3.78 | 3.1  | 3.56 | 6.16 | 7.45 | 9.9  | 10.1 | 13.8 | 17   | 19.7 |
| 3-8-3-0  | 228  | 205  | 191  | 184  | 184  | 139  | 163  | 188  | 178  | 213  | 196  | 223  | 211  | 233  |
| 3-8-3-1  | 209  | 190  | 176  | 174  | 174  | 129  | 151  | 175  | 169  | 195  | 181  | 203  | 188  | 204  |
| 3-8-3-2  | 137  | 121  | 115  | 113  | 134  | 105  | 122  | 154  | 148  | 174  | 166  | 184  | 179  | 189  |
| 3-8-3-3  | 13.7 | 18.9 | 26.7 | 31.2 | 58.1 | 54.3 | 69.2 | 96   | 101  | 119  | 110  | 125  | 115  | 120  |
| 3-8-3-4  | 0.45 | 1    | 1.43 | 1.92 | 3.54 | 3.61 | 5.1  | 7.5  | 8.93 | 12   | 12.7 | 16.5 | 19.4 | 19.9 |
| 3-10-3-0 | 206  | 183  | 168  | 161  | 164  | 121  | 140  | 166  | 159  | 193  | 171  | 197  | 183  | 208  |
| 3-10-3-1 | 203  | 184  | 166  | 159  | 165  | 119  | 146  | 166  | 163  | 191  | 180  | 195  | 182  | 198  |
| 3-10-3-2 | 130  | 114  | 111  | 113  | 126  | 96.4 | 117  | 145  | 148  | 168  | 158  | 181  | 169  | 188  |
| 3-10-3-3 | 4.89 | 6.57 | 9.46 | 13.5 | 25.6 | 26.3 | 36.1 | 58   | 69.4 | 76.3 | 70.1 | 77.7 | 71.6 | 68.3 |
| 3-10-3-4 | 2.1  | 2.53 | 3.53 | 3.94 | 10.1 | 10.1 | 13.9 | 22.7 | 27.8 | 32.2 | 30.9 | 37.9 | 39.4 | 39.7 |
| 3-12-3-0 | 221  | 202  | 193  | 188  | 195  | 144  | 156  | 187  | 180  | 211  | 200  | 222  | 208  | 229  |
| 3-12-3-1 | 226  | 207  | 199  | 197  | 207  | 147  | 165  | 194  | 186  | 213  | 198  | 216  | 204  | 224  |
| 3-12-3-2 | 167  | 147  | 138  | 133  | 144  | 114  | 134  | 159  | 157  | 187  | 171  | 193  | 186  | 198  |
| 3-12-3-3 | 48   | 54.4 | 64   | 68.8 | 101  | 87.9 | 103  | 139  | 140  | 161  | 151  | 164  | 159  | 162  |
| 3-12-3-4 | 0.63 | 0.89 | 1.32 | 2    | 3.44 | 3.23 | 4.99 | 6.8  | 8.77 | 11   | 11.4 | 14.8 | 18   | 20.2 |
| 3-14-3-0 | 243  | 225  | 212  | 201  | 210  | 156  | 176  | 204  | 197  | 226  | 212  | 240  | 230  | 249  |

|          |      |      |      |      |      |      |      |      |      |      |      |      |      |      |
|----------|------|------|------|------|------|------|------|------|------|------|------|------|------|------|
| 3-14-3-1 | 233  | 218  | 202  | 201  | 209  | 155  | 173  | 201  | 192  | 224  | 212  | 230  | 214  | 235  |
| 3-14-3-2 | 161  | 142  | 132  | 129  | 143  | 114  | 131  | 161  | 157  | 180  | 173  | 194  | 183  | 196  |
| 3-14-3-3 | 4.89 | 5.79 | 7.21 | 8.96 | 19   | 18.1 | 25.1 | 40.9 | 48.4 | 56.4 | 55.6 | 63.3 | 62.6 | 62   |
| 3-14-3-4 | 1.15 | 2.38 | 3.43 | 4.93 | 12.7 | 12.7 | 17.1 | 30.5 | 37.8 | 43.1 | 43.8 | 52.2 | 53.5 | 52.3 |
| 2-2-3-0  | /    | 238  | 226  | 219  | 231  | 166  | 183  | 217  | 206  | 237  | 217  | /    | 238  | /    |
| 2-2-3-1  | 247  | 234  | 225  | 223  | 233  | 169  | 184  | 216  | 204  | 236  | 222  | 243  | 236  | /    |
| 2-2-3-2  | 184  | 164  | 155  | 153  | 170  | 129  | 153  | 182  | 180  | 203  | 188  | 213  | 198  | 217  |
| 2-2-3-3  | 11.3 | 16.4 | 26.8 | 36.4 | 63   | 63.3 | 81.2 | 116  | 127  | 147  | 135  | 149  | 140  | 143  |
| 2-2-3-4  | 1.14 | 1.77 | 2.6  | 2.83 | 7.59 | 6.75 | 8.76 | 14.1 | 16.6 | 20   | 21.8 | 29   | 31.8 | 33.6 |
| 2-4-3-0  | 247  | 228  | 217  | 214  | 227  | 160  | 177  | 210  | 200  | 237  | 217  | 248  | 234  | /    |
| 2-4-3-1  | /    | 232  | 220  | 213  | 233  | 163  | 184  | 216  | 202  | 235  | 217  | 245  | 228  | /    |
| 2-4-3-2  | 164  | 144  | 138  | 137  | 152  | 117  | 136  | 167  | 164  | 188  | 175  | 197  | 192  | 197  |
| 2-4-3-3  | 2.07 | 2.99 | 4.34 | 5.81 | 15.6 | 13.6 | 18.9 | 33.4 | 44.1 | 50.2 | 49.9 | 56.5 | 57.1 | 57.7 |
| 2-4-3-4  | 0.06 | 0.25 | 0.53 | 0.73 | 1.66 | 2.24 | 2.95 | 4.84 | 5.39 | 7.06 | 7.5  | 10.7 | 13.7 | 14.9 |

**Table S4.** REE concentration (µg/L) in the filtrate for experiment 4.

|          | La   | Ce   | Pr   | Nd   | Sm   | Eu   | Gd   | Tb   | Dy   | Ho   | Er   | Tm   | Yb   | Lu   |
|----------|------|------|------|------|------|------|------|------|------|------|------|------|------|------|
| 3-2-6-0  | 35.4 | 34.5 | 34.2 | 32.2 | 39.2 | 27.3 | 26.4 | 32   | 29   | 35.2 | 34.7 | 39.7 | 35.9 | 40.8 |
| 3-2-6-1  | 7.79 | 6.85 | 6.27 | 7.01 | 7.18 | 5.38 | 6.85 | 7.73 | 8.45 | 10.3 | 11.2 | 11.9 | 11.5 | 14   |
| 3-2-6-2  | 13.5 | 11.5 | 9    | 10.9 | 10.1 | 7.67 | 10.4 | 12.9 | 14.1 | 18.3 | 17.2 | 21.7 | 20.6 | 21.9 |
| 3-2-6-3  | 16   | 13.9 | 13.6 | 11.6 | 19.1 | 15.8 | 19.7 | 25   | 26.1 | 27.5 | 25.5 | 28.5 | 27.3 | 28   |
| 3-2-6-4  | 1.63 | 1.61 | 2.18 | 2.46 | 4.9  | 4.65 | 6.77 | 10.6 | 11.8 | 14.3 | 13.4 | 17   | 18.4 | 18.9 |
| 3-4-6-0  | 35.4 | 33.7 | 33.2 | 30.8 | 35.8 | 26   | 27.5 | 32.8 | 31   | 37.6 | 36.4 | 41.4 | 40.5 | 43.5 |
| 3-4-6-1  | 15.4 | 12.5 | 11.7 | 11.9 | 11.2 | 8.67 | 11.4 | 15.4 | 16.8 | 19.6 | 20.8 | 22.7 | 22   | 24.5 |
| 3-4-6-2  | 19.7 | 15.8 | 14.4 | 14.6 | 15.3 | 12.8 | 16.3 | 21.4 | 22   | 28.4 | 28.2 | 30.8 | 29.4 | 33.5 |
| 3-4-6-3  | 23.9 | 19.2 | 18.7 | 17.1 | 23.2 | 20.5 | 24.5 | 31.4 | 29.6 | 34.5 | 32.5 | 35.4 | 33.2 | 34.2 |
| 3-4-6-4  | 0.59 | 1.17 | 1.9  | 2.86 | 5.96 | 6.42 | 7.3  | 13.8 | 16.2 | 18.6 | 19   | 23   | 24.3 | 23.9 |
| 3-6-6-0  | 18   | 14.4 | 12.9 | 13.4 | 13.4 | 9.51 | 11.3 | 13.7 | 13.7 | 16.9 | 16   | 17.7 | 16.3 | 19.2 |
| 3-6-6-1  | 20.9 | 17.3 | 16.5 | 15.7 | 18.3 | 12   | 14   | 18.5 | 19.5 | 25.6 | 23.5 | 27.5 | 26.3 | 27.5 |
| 3-6-6-2  | 20.3 | 16.1 | 15.3 | 15.1 | 16.4 | 12.7 | 16.4 | 22.4 | 22.5 | 28.6 | 27.5 | 31.8 | 30.3 | 33.5 |
| 3-6-6-3  | 22.1 | 17.5 | 16.5 | 16.6 | 20.5 | 17.7 | 21.4 | 26.4 | 25.5 | 31   | 27.2 | 30.8 | 28   | 32.2 |
| 3-6-6-4  | 0.68 | 0.99 | 1.47 | 1.96 | 4.19 | 4.98 | 6.02 | 10.6 | 13.1 | 15.8 | 15.2 | 19.7 | 22.2 | 22.1 |
| 3-7-6-0  | 16.4 | 13.4 | 12.3 | 11.7 | 12.2 | 9.81 | 11.3 | 13.6 | 13.1 | 17   | 17.5 | 18.7 | 16.8 | 20.3 |
| 3-7-6-1  | 18.6 | 15.5 | 14.1 | 13.7 | 15   | 10.4 | 13.7 | 17.3 | 18.8 | 23   | 22.3 | 25.4 | 24.1 | 26.8 |
| 3-7-6-2  | 19.9 | 15.8 | 14.9 | 15.1 | 15.6 | 13.2 | 16.3 | 21.8 | 21.7 | 28.5 | 28.6 | 32.6 | 29.8 | 34.7 |
| 3-7-6-3  | 17.8 | 14.8 | 13.5 | 13.3 | 18   | 14.7 | 18.6 | 24   | 23.4 | 26.5 | 23.9 | 27.1 | 24.9 | 26.8 |
| 3-7-6-4  | 0.62 | 1.06 | 1.51 | 2.3  | 4.54 | 5.07 | 6.06 | 10.3 | 12.6 | 14.5 | 14.5 | 17.7 | 21.4 | 19.9 |
| 3-8-6-0  | 13.3 | 11.2 | 10.4 | 9.51 | 10.4 | 7.87 | 8.7  | 11.1 | 11.5 | 14   | 13.3 | 15.6 | 15.2 | 16.4 |
| 3-8-6-1  | 10.7 | 8.79 | 7.92 | 7.43 | 8.13 | 6.53 | 7.17 | 10   | 10.4 | 12.8 | 13.3 | 15.1 | 14.4 | 15.9 |
| 3-8-6-2  | 13.2 | 10.7 | 9.8  | 10   | 11.6 | 9.01 | 12   | 15.7 | 15.2 | 20.4 | 19.7 | 23   | 22.3 | 24.6 |
| 3-8-6-3  | 16.6 | 13.9 | 13.5 | 12.4 | 19   | 15.1 | 18.8 | 24.6 | 22.5 | 26.2 | 24.6 | 28.4 | 27.5 | 26.5 |
| 3-8-6-4  | 0.42 | 0.69 | 1.14 | 1.52 | 3.13 | 3.23 | 4.04 | 6.96 | 9.8  | 10.7 | 10.9 | 14.2 | 16.6 | 17.1 |
| 3-10-6-0 | 28.3 | 25.8 | 25.9 | 24.1 | 29.1 | 20.1 | 22.3 | 24.8 | 25.1 | 28.9 | 26.2 | 31.3 | 29.9 | 34   |
| 3-10-6-1 | 10.3 | 8.71 | 8.05 | 8.84 | 8.82 | 6.58 | 8.63 | 10   | 9.89 | 13.3 | 13.9 | 15.8 | 15.1 | 15.7 |
| 3-10-6-2 | 12.5 | 10.3 | 9.75 | 10.1 | 10.4 | 9.11 | 12.8 | 15.7 | 16.3 | 23   | 21.7 | 25.2 | 24.4 | 27   |
| 3-10-6-3 | 14.4 | 11.6 | 11.3 | 11.3 | 14.1 | 13.7 | 15.6 | 21.8 | 21.6 | 23.4 | 22.1 | 25   | 23.9 | 24   |
| 3-10-6-4 | 0.65 | 0.96 | 1.46 | 1.73 | 4.12 | 4.23 | 5.75 | 9.65 | 11   | 14   | 13.7 | 16.9 | 19.3 | 18.3 |
| 3-12-6-0 | 17.3 | 13.3 | 11.1 | 11.1 | 10.8 | 8.22 | 9.5  | 11.4 | 11.4 | 15.4 | 15.4 | 16.3 | 15.7 | 17.1 |
| 3-12-6-1 | 24.1 | 18.9 | 17.7 | 17.4 | 16.7 | 12.6 | 15   | 19.1 | 19   | 25.5 | 23.1 | 27.9 | 25.2 | 29.3 |
| 3-12-6-2 | 20.9 | 15.7 | 14.7 | 14.9 | 14.8 | 12.2 | 16.6 | 20.7 | 21.7 | 26.6 | 26.6 | 30.4 | 28.5 | 31   |
| 3-12-6-3 | 23.3 | 19.7 | 18.4 | 16.1 | 24   | 19.7 | 23   | 32.2 | 31.8 | 35.5 | 31.4 | 35.8 | 34   | 33.5 |
| 3-12-6-4 | 0.29 | 0.47 | 0.7  | 1.1  | 3.25 | 3.4  | 3.97 | 8.1  | 10.4 | 11.7 | 11.9 | 15.2 | 17.4 | 17.2 |
| 3-14-6-0 | 21.6 | 16.2 | 14   | 14.3 | 13.6 | 9.93 | 13.4 | 15.8 | 17   | 21.5 | 19.1 | 23.6 | 22   | 24   |

|          |      |      |      |      |      |      |      |      |      |      |      |      |      |      |
|----------|------|------|------|------|------|------|------|------|------|------|------|------|------|------|
| 3-14-6-1 | 26.1 | 22.3 | 19.5 | 18.6 | 18.6 | 13.8 | 18   | 21.6 | 21.6 | 28.1 | 28   | 31   | 29.4 | 32.1 |
| 3-14-6-2 | 23   | 18   | 16.8 | 16   | 17.5 | 14   | 18.2 | 22.7 | 23   | 29.4 | 29.5 | 31.5 | 29.2 | 33.8 |
| 3-14-6-3 | 27.7 | 22.8 | 22   | 20.2 | 27.7 | 23   | 27   | 36.9 | 36.1 | 40   | 36.7 | 39.4 | 38.9 | 39   |
| 3-14-6-4 | 0.33 | 0.47 | 0.8  | 1.21 | 2.93 | 3.22 | 4.63 | 7.32 | 9.57 | 11.4 | 11   | 13.7 | 16.2 | 16.3 |
| 2-2-6-0  | 25   | 19.6 | 17.3 | 15.9 | 15   | 12.9 | 15.4 | 19.3 | 20   | 24.9 | 23.6 | 26.9 | 24.4 | 28.4 |
| 2-2-6-1  | 33.8 | 27   | 23.6 | 23.7 | 21.7 | 16.4 | 20.8 | 24.4 | 24.9 | 32.7 | 29.9 | 35.3 | 32.6 | 37.7 |
| 2-2-6-2  | 32.8 | 26.4 | 24.4 | 23.4 | 25   | 19.4 | 24.5 | 31.6 | 31.3 | 40.8 | 37.9 | 43.1 | 41.7 | 44.9 |
| 2-2-6-3  | 38.1 | 31.4 | 30.2 | 28   | 33.6 | 30   | 37.2 | 45.7 | 46.1 | 51.8 | 46.1 | 51.3 | 50.6 | 48.7 |
| 2-2-6-4  | 0.31 | 0.52 | 0.82 | 1.07 | 2.68 | 2.91 | 4.05 | 7.43 | 9.99 | 10.6 | 11.4 | 15.4 | 18   | 18.4 |
| 2-4-6-0  | 20.1 | 15.2 | 13.5 | 12.1 | 13.2 | 9.24 | 11.4 | 14.7 | 13.5 | 17.5 | 17.7 | 19.1 | 18.1 | 19.7 |
| 2-4-6-1  | 24.6 | 19.3 | 18.2 | 17.2 | 15.8 | 12.6 | 15.7 | 20.1 | 19.6 | 25.6 | 23.9 | 29.3 | 26.7 | 30.3 |
| 2-4-6-2  | 23   | 18.7 | 16.8 | 16.4 | 17.2 | 14.7 | 19.1 | 23.2 | 24.9 | 29.5 | 28   | 33.9 | 31.9 | 34.7 |
| 2-4-6-3  | 25.4 | 23.2 | 22.9 | 21.5 | 28.5 | 24.5 | 30.6 | 39.1 | 38.5 | 44.1 | 40.4 | 46.5 | 45.6 | 47.8 |
| 2-4-6-4  | 0.37 | 0.72 | 1.12 | 1.31 | 4.06 | 4.23 | 5.59 | 9.11 | 11.8 | 13.6 | 13.7 | 18.1 | 19.6 | 21.3 |
